# Supplementary material for: N, LNR or LODDS: Which Is the Most Appropriate Lymph Node Classification Scheme for Patients with Radically Resected Pancreatic Cancer?
Source: MDPI journal article supplement (doi:10.3390/cancers14071834), 2022-04-06
Supplement: s1 [file s1]

**Table S1.** ROC analysis of the total number of resected lymph nodes (tLN), positive lymph nodes (pLN), LNR and LODDS. for 1- year, and 3-year OS.

| Overall Survival (OS) | LN evaluation | ROC analysis |             |                  |
|-----------------------|---------------|--------------|-------------|------------------|
|                       |               | AUC          | 95% CI      | P value          |
| <b>1-year OS</b>      | LODDS         | 0.616        | 0.549-0.683 | <b>0.001</b>     |
|                       | LNR           | 0.608        | 0.540-0.676 | <b>0.002</b>     |
|                       | tLN           | 0.521        | 0.451-0.591 | 0.558            |
|                       | pLN           | 0.605        | 0.537-0.673 | <b>0.003</b>     |
| <b>3-year OS</b>      | LODDS         | 0.676        | 0.596-0.755 | <b>&gt;0.001</b> |
|                       | LNR           | 0.672        | 0.593-0.751 | <b>&gt;0.001</b> |
|                       | tLN           | 0.579        | 0.494-0.664 | 0.068            |
|                       | pLN           | 0.686        | 0.610-0.763 | <b>&gt;0.001</b> |

**Table S2** OS depending on the N classification

|            | Subcategory | HR*   | 95%CI*      | P value* |
|------------|-------------|-------|-------------|----------|
| N category | 0           | 1     | (Reference) |          |
|            | 1           | 1.233 | 0.871-1.744 | 0.237    |
|            | 2           | 0.638 | 0.193-2.109 | 0.461    |

\*Adjusted for sex, age, localization, neoadjuvant therapy, extend of tumor (T), distant metastasis (M), differentiation (G) and resection margin (R) using the base model

**Table S3** OS depending on the respective LNR classification. Each LNR subcategory is defined by a LNR range as indicated

| LNR classification | Subcategory | LNR Range   | HR*   | 95%CI*      | P value*     |
|--------------------|-------------|-------------|-------|-------------|--------------|
| Agnes et al. [13]  | 1           | 0           | 1     | (reference) |              |
|                    | 2           | 0.01; 0.10  | 0.947 | 0.626-1.432 | 0.795        |
|                    | 3           | 0.11; 0.25  | 1.472 | 0.995-2.178 | 0.053        |
|                    | 4           | 0.26; 0.40  | 1.227 | 0.743-2.026 | 0.425        |
|                    | 5           | > 0.40      | 2.484 | 1.379-4.475 | <b>0.002</b> |
| Arslan et al. [14] | 1           | ≤ 0.05      | 1     | (reference) |              |
|                    | 2           | > 0.05-0.20 | 1.563 | 1.107-2.207 | <b>0.011</b> |

|                            |   |                      |       |              |               |
|----------------------------|---|----------------------|-------|--------------|---------------|
|                            | 3 | > 0.20               | 1.697 | 1.155-2.494  | <b>0.007</b>  |
| Bagante et al. [15]        | 1 | 0                    | 1     | (reference)  |               |
|                            | 2 | 0.01; 0.25           | 1.176 | 0.821-1.685  | 0.378         |
|                            | 3 | 0.26; 0.50           | 1.357 | 0.846-2.176  | 0.205         |
|                            | 4 | > 0.50               | 2.097 | 1.008-4.361  | <b>0.047</b>  |
| Calero et al. [16]         | 1 | 0                    | 1     | (reference)  |               |
|                            | 2 | 0.01; 0.25           | 1.170 | 0.816-1.676  | 0.393         |
|                            | 3 | 0.26; 0.75           | 1.447 | 0.918-2.280  | 0.112         |
|                            | 4 | > 0.75               | 2.990 | 0.382-23.350 | 0.297         |
| Cao et al. [17]            | 1 | 0; 0.24              | 1     | (reference)  |               |
|                            | 2 | 0.25; 0.28           | 1.210 | 0.846-1.729  | 0.296         |
|                            | 3 | > 0.28               | 1.254 | 0.781-2.015  | 0.349         |
| Chang et al. [18]          | 1 | $\leq 0.08$          | 1     | (reference)  |               |
|                            | 2 | 0.09; 0.17           | 1.911 | 1.343-2.722  | <b>0.0003</b> |
|                            | 3 | 0.18; 0.33           | 1.466 | 1.027-2.029  | <b>0.035</b>  |
|                            | 4 | > 0.33               | 1.660 | 1.040-2.651  | <b>0.034</b>  |
| Conci et al. [19]          | 1 | 0                    | 1     | (reference)  |               |
|                            | 2 | > 0; $\leq 0.25$     | 1.174 | 0.818-1.683  | 0.384         |
|                            | 3 | > 0.25               | 1.392 | 0.892-2.173  | 0.146         |
| Fang et al. [20]           | 1 | < 0.10               | 1     | (reference)  |               |
|                            | 2 | 0.10; 0.33           | 1.532 | 1.139-2.060  | <b>0.005</b>  |
|                            | 3 | $\geq 0.34$          | 1.590 | 1.004-2.519  | <b>0.048</b>  |
| Fortea-Sanchis et al. [21] | 1 | 0; 0.24              | 1     | (reference)  |               |
|                            | 2 | 0.25; 0.60           | 1.171 | 0.822-1.667  | 0.381         |
|                            | 3 | > 0.60               | 2.487 | 1.038-5.964  | <b>0.041</b>  |
| Huang et al. [22]          | 1 | < 0.25               | 1     | (reference)  |               |
|                            | 2 | $\geq 0.25$ ; < 0.5  | 1.104 | 0.757-1.611  | 0.607         |
|                            | 3 | $\geq 0.50$ ; < 0.75 | 1.939 | 0.983-3.828  | 0.056         |
|                            | 4 | $\geq 0.75$          | 1.485 | 0.451-4.894  | 0.516         |
| Jian-Hui et al. [23]       | 1 | 0                    | 1     | (reference)  |               |
|                            | 2 | 0.01; $\leq 0.10$    | 0.920 | 0.609-1.390  | 0.692         |
|                            | 3 | > 0.10; $\leq 0.25$  | 1.462 | 0.988-2.164  | 0.058         |
|                            | 4 | > 0.25               | 1.520 | 0.967-2.390  | 0.070         |
| La Torre et al. [25]       | 1 | 0                    | 1     | (reference)  |               |
|                            | 2 | 0.010; 0.199         | 1.170 | 0.808-1.692  | 0.405         |
|                            | 3 | 0.200; 0.399         | 1.238 | 0.803-1.909  | 0.335         |
|                            | 4 | > 0.399              | 2.233 | 1.247-4.000  | <b>0.007</b>  |
| Lee et al. [26]            | 1 | $\leq 0.10$          | 1     | (reference)  |               |
|                            | 2 | >0.10; $\leq 0.20$   | 1.566 | 1.110-2.208  | <b>0.011</b>  |
|                            | 3 | >0.20; $\leq 0.30$   | 1.687 | 1.123-2.533  | <b>0.012</b>  |
|                            | 4 | >0.30                | 1.380 | 0.900-2.117  | 0.139         |
| Liu et al. [27]            | 1 | 0                    | 1     | (reference)  |               |

|                       |   |               |       |             |              |
|-----------------------|---|---------------|-------|-------------|--------------|
|                       | 2 | 0.01; 0.10    | 0.943 | 0.624-1.426 | 0.781        |
|                       | 3 | 0.11; 0.40    | 1.405 | 0.962-2.052 | 0.078        |
|                       | 4 | > 0.40        | 2.506 | 1.392-4.512 | <b>0.002</b> |
| Malleo et al. [28]    | 1 | 0             | 1     | (reference) |              |
|                       | 2 | >0; ≤0.20     | 1.169 | 0.809-1.690 | 0.405        |
|                       | 3 | >0.20; 0.40   | 1.236 | 0.800-1.909 | 0.339        |
|                       | 4 | >0.40         | 2.496 | 1.367-4.459 | <b>0.003</b> |
| Negi et al. [24]      | 1 | 0             | 1     | (reference) |              |
|                       | 2 | > 0; ≤ 0.50   | 1.206 | 0.848-1.716 | 0.298        |
|                       | 3 | > 0.50        | 2.061 | 0.992-4.283 | 0.053        |
| Riediger et al. [29]  | 1 | < 0.10        | 1     | (reference) |              |
|                       | 2 | 0.10; 0.199   | 1.583 | 1.132-2.215 | <b>0.007</b> |
|                       | 3 | ≥ 0.20        | 1.499 | 1.064-2.113 | <b>0.021</b> |
| Rosenberg et al. [30] | 1 | 0             | 1     | (reference) |              |
|                       | 2 | 0.01; 0.17    | 1.176 | 0.805-1.716 | 0.401        |
|                       | 3 | 0.18; 0.41    | 1.224 | 0.813-1.842 | 0.333        |
|                       | 4 | 0.42; 0.69    | 1.188 | 1.114-4.298 | <b>0.023</b> |
|                       | 5 | ≥0.70         | 2.933 | 1.155-7.446 | <b>0.024</b> |
| Smith et al. [31]     | 1 | 0             | 1     | (reference) |              |
|                       | 2 | >0; ≤ 1/15    | 0.835 | 0.513-1.360 | 0.469        |
|                       | 3 | >1/15; ≤ 3/10 | 1.405 | 0.673-2.028 | 0.070        |
|                       | 4 | >3/10; ≤ 7/10 | 1.156 | 0.697-1.914 | 0.574        |
|                       | 5 | > 7/10        | 2.861 | 1.123-7.284 | <b>0.027</b> |
| Song et al. [32]      | 1 | 0             | 1     | (reference) |              |
|                       | 2 | 0.01; 0.11    | 1.005 | 0.673-1.499 | 0.981        |
|                       | 3 | 0.12; 0.36    | 1.485 | 1.011-2.181 | <b>0.044</b> |
|                       | 4 | 0.37; 0.66    | 1.130 | 0.603-2.118 | 0.703        |
|                       | 5 | > 0.66        | 3.015 | 1.184-7.679 | <b>0.020</b> |
| Sun et al. [33]       | 1 | 0             | 1     | (reference) |              |
|                       | 2 | 0.01; 0.20    | 1.151 | 0.797-1.662 | 0.454        |
|                       | 3 | 0.21; 0.50    | 1.347 | 0.883-2.055 | 0.166        |
|                       | 4 | > 0.5         | 2.085 | 1.004-4.331 | <b>0.049</b> |
| Wang et al. [34]      | 1 | 0             | 1     | (reference) |              |
|                       | 2 | 0.01; 0.30    | 1.475 | 1.075-2.025 | <b>0.016</b> |
|                       | 3 | 0.31; 0.60    | 1.398 | 0.913-2.141 | 0.123        |
|                       | 4 | 0.61; 1       | 2.327 | 1.224-4.425 | <b>0.001</b> |
| Wang et al. [35]      | 1 | < 0.07        | 1     | (reference) |              |
|                       | 2 | 0.07; < 0.25  | 1.228 | 0.860-1.753 | 0.258        |
|                       | 3 | 0.25; < 0.50  | 1.149 | 0.691-1.910 | 0.592        |
|                       | 4 | 0.50; 1       | 2.777 | 1.092-7.065 | <b>0.032</b> |
| Xu et al. [36]        | 1 | 0             | 1     | (reference) |              |
|                       | 2 | >0; ≤ 0.125   | 1.072 | 0.723-1.589 | 0.729        |

|                  |   |                       |       |             |              |
|------------------|---|-----------------------|-------|-------------|--------------|
|                  | 3 | $> 0.125; \leq 0.425$ | 1.322 | 0.896-1.951 | 0.159        |
|                  | 4 | $> 0.425; \leq 1$     | 2.400 | 1.307-4.403 | <b>0.005</b> |
| Zhou et al. [37] | 1 | $0; \leq 0.30$        | 1     | (reference) |              |
|                  | 2 | $> 0.30; \leq 0.70$   | 0.971 | 0.642-1.468 | 0.889        |
|                  | 3 | $> 0.70; \leq 1$      | 2.290 | 0.957-5.474 | 0.063        |

\*Adjusted for sex, age, localization, neoadjuvant therapy, extend of tumor (T), distant metastasis (M), differentiation (G) and resection margin (R) using the base model

**Table S4** OS depending on the respective LODDS classification. Each LODDS subcategory is defined by a value range as indicated. \*The indicated LODDS subcategories were omitted as none of our included patients exhibited LODDS value within this range

| LODDS classification | Subcategory | LODDS Range         | HR*   | 95%CI*      | P value*     |
|----------------------|-------------|---------------------|-------|-------------|--------------|
| Amini et al. [38]    | 1           | $\leq -2$           | 1     | (Reference) |              |
|                      | 2           | $-2; < 0$           | 1.499 | 1.118-2.012 | <b>0.007</b> |
|                      | 3           | $\geq 0$            | 2.224 | 1.193-4.150 | <b>0.012</b> |
| Amini et al. [39]    | 1           | $\leq -3$           | 1     | (Reference) |              |
|                      | 2           | $> -3; < 0$         | 1.660 | 1.168-2.358 | <b>0.005</b> |
|                      | 3           | $\geq 0$            | 2.742 | 1.396-5.388 | <b>0.003</b> |
| Bagante et al. [15]  | 1           | $< -2$              |       | (Reference) |              |
|                      | 2           | $-1.99; -0.90$      | 1.607 | 1.187-2.178 | <b>0.002</b> |
|                      | 3           | $-0.89; 1.50$       | 1.390 | 0.924-2.093 | 0.114        |
|                      | 4*          | $> 1.5$             | -     | -           | -            |
| Calero et al. [16]   | 1           | $\leq -3$           | 1     | (Reference) |              |
|                      | 2           | $> -3; \leq -1$     | 1.649 | 1.153-2.358 | <b>0.006</b> |
|                      | 3           | $> -1; \leq 3$      | 1.837 | 1.173-2.878 | <b>0.008</b> |
|                      | 4*          | $> 3$               | -     | -           | -            |
| Cao et al. [17]      | 1           | $\leq -0.5$         | 1     | (Reference) |              |
|                      | 2           | $> -0.5; \leq 0$    | 0.842 | 0.446-1.589 | 0.595        |
|                      | 3           | $> 0; \leq 0.5$     | 1.261 | 0.464-3.428 | 0.650        |
|                      | 4           | $> 0.5$             | 2.256 | 0.949-5.366 | 0.066        |
| Cao et al. [40]      | 1           | $\leq -2.6$         | 1     | (Reference) |              |
|                      | 2           | $> -2.6; \leq -1.6$ | 1.573 | 1.088-2.274 | <b>0.016</b> |
|                      | 3           | $> -1.6; \leq -0.5$ | 1.725 | 1.201-2.478 | <b>0.003</b> |
|                      | 4           | $> -0.5$            | 1.679 | 0.961-2.934 | 0.069        |
| Chang et al. [18]    | 1           | $\leq -0.92$        | 1     | (Reference) |              |
|                      | 2           | $-0.91; -0.62$      | 0.982 | 0.560-1.723 | 0.949        |
|                      | 3           | $-0.61; -0.26$      | 0.816 | 0.453-1.468 | 0.497        |
|                      | 4           | $> -0.26$           | 2.049 | 1.194-3.517 | <b>0.009</b> |
| Conci et al. [19]    | 1           | $\leq -1.35$        | 1     | (Reference) |              |
|                      | 2           | $> -1.35; \leq -1$  | 1.223 | 0.789-1.896 | 0.368        |
|                      | 3           | $> -1; \leq -0.25$  | 1.082 | 0.718-1.630 | 0.706        |

|                             |    |                        |       |             |              |
|-----------------------------|----|------------------------|-------|-------------|--------------|
|                             | 4  | $> -0.25$              | 2.197 | 1.273-3.792 | <b>0.005</b> |
| Fang et al. [20]            | 1  | $< -0.82$              | 1     | (Reference) |              |
|                             | 2  | $\geq -0.82; < -0.57$  | 0.895 | 0.525-1.526 | 0.684        |
|                             | 3  | $\geq -0.57$           | 1.118 | 0.691-1.811 | 0.649        |
| Forteza-Sanchis et al. [21] | 1  | $< -2$                 | 1     | (Reference) |              |
|                             | 2  | $\geq -2; \leq -1$     | 1.541 | 1.129-2.104 | <b>0.006</b> |
|                             | 3  | $> -1$                 | 1.561 | 1.064-2.291 | <b>0.023</b> |
| He et al. [41]              | 1  | $< -3$                 | 1     | (Reference) |              |
|                             | 2  | $\geq -3; < -2$        | 1.438 | 0.943-2.192 | 0.092        |
|                             | 3  | $\geq -2; < -1$        | 1.836 | 1.251-2.697 | <b>0.002</b> |
|                             | 4  | $\geq -1; < 0$         | 1.688 | 1.048-2.717 | <b>0.031</b> |
|                             | 5  | $\geq 0$               | 2.723 | 1.388-5.345 | <b>0.004</b> |
| Huang et al. [22]           | 1  | $< -1$                 | 1     | (Reference) |              |
|                             | 2  | $\geq -1; < 0$         | 1.124 | 0.764-1.655 | 0.551        |
|                             | 3  | $\geq 0; < 1$          | 1.945 | 0.985-3.838 | 0.055        |
|                             | 4  | $\geq 1; < 2$          | 1.495 | 0.454-4.929 | 0.509        |
|                             | 5* | $\geq 2$               | -     | -           |              |
| Jian-Hui et al. [23]        | 1  | $\leq -1.5$            | 1     | (Reference) |              |
|                             | 2  | $> -1.5; \leq -1$      | 1.241 | 0.869-1.772 | 0.236        |
|                             | 3  | $> -1; \leq 0$         | 1.247 | 0.842-1.847 | 0.270        |
|                             | 4  | $> 0$                  | 1.935 | 0.987-3.792 | 0.055        |
| Lee et al. [26]             | 1  | $\leq -4$              | 1     | (Reference) |              |
|                             | 2  | $> -4; \leq -2.5$      | 1.042 | 0.471-2.307 | 0.919        |
|                             | 3  | $> -2.5; \leq -2$      | 1.394 | 0.609-3.194 | 0.432        |
|                             | 4  | $> -2; \leq -0.5$      | 1.763 | 0.814-3.818 | 0.150        |
|                             | 5  | $> -0.5$               | 1.682 | 0.690-4.101 | 0.253        |
| Persiani et al. [42]        | 1  | $\leq -1.36$           | 1     | (Reference) |              |
|                             | 2  | $-1.35; -0.53$         | 1.297 | 0.935-1.800 | 0.120        |
|                             | 3  | $\geq -0.52$           | 1.178 | 0.711-1.953 | 0.525        |
| Ramacciato et al. [43]      | 1  | $< -0.005$             | 1     | (Reference) |              |
|                             | 2  | $\geq -0.005; < 0.012$ | 1.893 | 0.460-7.795 | 0.377        |
|                             | 3* | $\geq 0.012; < 0.026$  | -     | -           | -            |
|                             | 4  | $\geq 0.026$           | 1.744 | 0.905-3.361 | 0.097        |
| Riediger et al. [29]        | 1  | $< -1$                 | 1     | (Reference) |              |
|                             | 2  | $-1; -0.500$           | 1.276 | 0.847-1.923 | 0.244        |
|                             | 3  | $-0.499; -0.001$       | 0.777 | 0.384-1.573 | 0.483        |
|                             | 4  | $\geq 0$               | 1.789 | 0.974-3.285 | 0.061        |
|                             | 5* | $> -0.5$               | -     | -           | -            |
| Song et al. [32]            | 1  | $\leq -2.51$           | 1     | (Reference) |              |
|                             | 2  | $> -2.51; \leq -1.68$  | 1.610 | 1.107-2.343 | 0.013        |
|                             | 3  | $> -1.68; \leq -0.51$  | 1.678 | 1.188-2.370 | <b>0.003</b> |
|                             | 4  | $> -0.51; \leq 0.73$   | 1.365 | 0.745-2.499 | 0.314        |

|                  |   |                       |       |              |               |
|------------------|---|-----------------------|-------|--------------|---------------|
|                  | 5 | $> 0.73$              | 3.552 | 1.430-8.825  | <b>0.006</b>  |
| Sun et al. [33]  | 1 | $\leq -1.500$         | 1     | (Reference)  |               |
|                  | 2 | -1.499; -1.000        | 1.231 | 0.862-1.759  | 0.253         |
|                  | 3 | -0.999; -0.500        | 1.376 | 0.900-2.104  | 0.141         |
|                  | 4 | -0.499; 0             | 0.959 | 0.497-1.850  | 0.900         |
|                  | 5 | $> 0$                 | 1.901 | 0.969-3.730  | 0.062         |
| Toth et al. [44] | 1 | $< -1.125$            | 1     | (Reference)  |               |
|                  | 2 | -1.125; -0.251        | 1.041 | 0.722-1.501  | 0.830         |
|                  | 3 | -0.250; 0.749         | 1.972 | 1.025-3.792  | <b>0.042</b>  |
|                  | 4 | $\geq 0.750$          | 2.450 | 1.026-5.851  | <b>0.044</b>  |
| Wang et al. [45] | 1 | $< -2.2$              | 1     | (Reference)  |               |
|                  | 2 | -2.2; $< -1.1$        | 1.463 | 1.069-2.002  | <b>0.017</b>  |
|                  | 3 | -1.1; $< 0$           | 1.340 | 0.901-1.994  | 0.148         |
|                  | 4 | 0; $< 1.1$            | 2.191 | 1.138-4.218  | <b>0.019</b>  |
|                  | 5 | $\geq 1.1$            | 3.314 | 0.429-25.595 | 0.251         |
| Wang et al. [35] | 1 | $\leq -2.5$           | 1     | (Reference)  |               |
|                  | 2 | $> -2.5; \leq -1$     | 1.573 | 1.143-2.165  | <b>0.005</b>  |
|                  | 3 | $> -1; \leq 0.9$      | 1.666 | 1.101-2.520  | <b>0.016</b>  |
|                  | 4 | $> 0.9$               | 2.165 | 0.640-7.327  | 0.214         |
| Wu et al. [46]   | 1 | $\leq -1.46$          | 1     | (Reference)  |               |
|                  | 2 | -1.45; -1.17          | 1.409 | 0.925-2.147  | 0.110         |
|                  | 3 | -1.16; -0.73          | 1.386 | 0.900-2.137  | 0.139         |
|                  | 4 | $\geq -0.72$          | 1.357 | 0.889-2.069  | 0.157         |
| Xu et al. [36]   | 1 | $\leq -2.80$          | 1     | (Reference)  |               |
|                  | 2 | $> -2.80; \leq -1.60$ | 1.509 | 1.035-2.201  | <b>0.033</b>  |
|                  | 3 | $> -1.60; \leq -0.31$ | 1.595 | 1.087-2.339  | <b>0.017</b>  |
|                  | 4 | $> -0.31$             | 2.965 | 1.632-5.387  | <b>0.0004</b> |
| Xu et al. [47]   | 1 | $< -1$                | 1     | (Reference)  |               |
|                  | 2 | -1.000; -0.501        | 1.294 | 0.857-1.952  | 0.220         |
|                  | 3 | -0.500; -0.001        | 0.796 | 0.392-1.617  | 0.528         |
|                  | 4 | 0; 0.499              | 1.452 | 0.636-3.314  | 0.376         |
|                  | 5 | $\geq 0.500$          | 2.396 | 0.998-5.756  | 0.051         |
| Yang et al. [48] | 1 | $\leq -1.43$          | 1     | (Reference)  |               |
|                  | 2 | $> -1.43; \leq -1.20$ | 1.447 | 0.898-2.332  | 0.129         |
|                  | 3 | $> -1.20; \leq -0.69$ | 1.356 | 0.912-2.018  | 0.133         |
|                  | 4 | $> -0.69$             | 1.307 | 0.853-2.003  | 0.219         |
| Zhou et al. [37] | 1 | $\leq -1$             | 1     | (Reference)  |               |
|                  | 2 | -0.999; -0.500        | 1.317 | 0.874-1.985  | 0.188         |
|                  | 3 | -0.499; 0.500         | 0.990 | 0.566-1.733  | 0.973         |
|                  | 4 | $> 0.500$             | 2.468 | 1.028-5.927  | <b>0.043</b>  |

\*Adjusted for sex, age, localization, neoadjuvant therapy, extend of tumor (T), distant metastasis (M), differentiation (G) and resection margin (R) using the base model

**Table S5** C statistic as a measure of model discrimination for various LNR classifications in comparison with the N category for the entire patient collective

| Criteria Order          | C statistic | C <sub>SE</sub> | Delta C    | P <sub>c</sub>   |
|-------------------------|-------------|-----------------|------------|------------------|
| LNR Agnes [13]          | 0.6364693   | 0.0208194       | 0.0152308  | 0.1194603        |
| LNR Arslan [14]         | 0.6390056   | 0.0213279       | 0.0177670  | <b>0.0421453</b> |
| LNR Bagante [15]        | 0.6218198   | 0.0219973       | 0.0005812  | 0.4713599        |
| LNR Calero [16]         | 0.6244221   | 0.0219783       | 0.0031835  | 0.3442393        |
| LNR Cao [17]            | 0.6211064   | 0.0219581       | -0.0001321 | 0.5072421        |
| LNR Chang [18]          | 0.6409078   | 0.0206831       | 0.0196692  | 0.0588528        |
| LNR Conci [19]          | 0.6245013   | 0.0220587       | 0.0032628  | 0.3365385        |
| LNR Fang [20]           | 0.6340916   | 0.0210495       | 0.0128530  | 0.1419451        |
| LNR Fortea Sanchis [21] | 0.6221104   | 0.0223456       | 0.0008718  | 0.4603308        |
| LNR Huang [22]          | 0.6186891   | 0.0223129       | -0.0025495 | 0.6157067        |
| LNR Jian Hui [23]       | 0.6340387   | 0.0209895       | 0.0128002  | 0.1536905        |
| LNR Negi [24]           | 0.6196270   | 0.0219352       | -0.0016116 | 0.5801421        |
| LNR La Torre [25]       | 0.6245938   | 0.0216094       | 0.0033553  | 0.3542798        |
| LNR Lee [26]            | 0.6366807   | 0.0207697       | 0.0154421  | 0.1053879        |
| LNR Liu [27]            | 0.6355182   | 0.0209761       | 0.0142797  | 0.1293472        |
| LNR Malleo [28]         | 0.6258751   | 0.0215936       | 0.0046366  | 0.3110239        |
| LNR Riediger [29]       | 0.6336689   | 0.0208742       | 0.0124303  | 0.1443088        |
| LNR Rosenberg [30]      | 0.6239465   | 0.0215908       | 0.0027080  | 0.3833184        |
| LNR Smith [31]          | 0.6326649   | 0.0210261       | 0.0114264  | 0.1701391        |
| LNR Song [32]           | 0.6321101   | 0.0209902       | 0.0108716  | 0.1631999        |
| LNR Sun [33]            | 0.6232464   | 0.0218289       | 0.0020079  | 0.4033919        |
| LNR Wang [34]           | 0.6273810   | 0.0211816       | 0.0061425  | 0.2792208        |
| LNR Wang [35]           | 0.6211857   | 0.0219768       | -0.0000528 | 0.5026851        |
| LNR Xu [36]             | 0.6294550   | 0.0213743       | 0.0082164  | 0.2154295        |
| LNR Zhou [37]           | 0.6197987   | 0.0223085       | -0.0014399 | 0.5667048        |
| N category              | 0.6212385   | 0.0218488       | 0.0000000  | NA               |

NA, not applicable

**Table S6** C statistic as a measure of model discrimination for various LODDS classifications in comparison with the N category for the entire patient collective

| Criteria Order            | C statistic | C <sub>SE</sub> | Delta C    | P <sub>c</sub>   |
|---------------------------|-------------|-----------------|------------|------------------|
| LODDS Amini [38]          | 0.6318195   | 0.0211029       | 0.0105810  | 0.1748382        |
| LODDS Amini [39]          | 0.6375921   | 0.0214959       | 0.0163536  | 0.0614668        |
| LODDS Bagante [15]        | 0.6346067   | 0.0207568       | 0.0133682  | 0.1267251        |
| LODDS Calero [16]         | 0.6404586   | 0.0215789       | 0.0192201  | <b>0.0328635</b> |
| LODDS Cao [17]            | 0.6418457   | 0.0211808       | 0.0206071  | <b>0.0335283</b> |
| LODDS Cao [40]            | 0.6185702   | 0.0222217       | -0.0026684 | 0.6212371        |
| LODDS Chang [18]          | 0.6206969   | 0.0218971       | -0.0005416 | 0.5213252        |
| LODDS Conci [19]          | 0.6245674   | 0.0218755       | 0.0033288  | 0.3689825        |
| LODDS Fang [20]           | 0.6200761   | 0.0222450       | -0.0011625 | 0.5543410        |
| LODDS Fortea Sanchis [21] | 0.6331669   | 0.0210573       | 0.0119284  | 0.1570066        |
| LODDS He [41]             | 0.6405511   | 0.0211159       | 0.0193126  | <b>0.0443455</b> |
| LODDS Huang [22]          | 0.6185041   | 0.0222723       | -0.0027344 | 0.6232704        |

|                       |           |           |            |           |
|-----------------------|-----------|-----------|------------|-----------|
| LODDS Jian Hui [23]   | 0.6223878 | 0.0219051 | 0.0011492  | 0.4499498 |
| LODDS Lee [26]        | 0.6379224 | 0.0209451 | 0.0166838  | 0.0735181 |
| LODDS Persiani [42]   | 0.6218594 | 0.0219581 | 0.0006209  | 0.4714418 |
| LODDS Ramacciato [43] | 0.6168926 | 0.0222692 | -0.0043460 | 0.6892700 |
| LODDS Riediger [29]   | 0.6182928 | 0.0221902 | -0.0029458 | 0.6277033 |
| LODDS Song [32]       | 0.6388999 | 0.0210377 | 0.0176614  | 0.0656073 |
| LODDS Sun [33]        | 0.6217141 | 0.0217800 | 0.0004755  | 0.4793164 |
| LODDS Toth [44]       | 0.6230086 | 0.0219990 | 0.0017701  | 0.4271036 |
| LODDS Wang [45]       | 0.6249505 | 0.0214143 | 0.0037119  | 0.3649508 |
| LODDS Wang [35]       | 0.6375789 | 0.0211583 | 0.0163404  | 0.0742148 |
| LODDS Wu [46]         | 0.6261658 | 0.0216889 | 0.0049272  | 0.3073879 |
| LODDS Xu [36]         | 0.6200365 | 0.0222427 | -0.0012021 | 0.5536899 |
| LODDS Xu [47]         | 0.6380809 | 0.0211336 | 0.0168424  | 0.0609815 |
| LODDS Yang [48]       | 0.6267206 | 0.0215700 | 0.0054820  | 0.2834110 |
| LODDS Zhou [37]       | 0.6227709 | 0.0222931 | 0.0015323  | 0.4309522 |
| N category            | 0.6212385 | 0.0218488 | 0.0000000  | NA        |

---

NA, not applicable
